# Supplementary material for: Imbalance learning for the prediction of N6-Methylation sites in mRNAs
Source: PubMed Central journal article supplement (PMC6090857; doi:10.1186/s12864-018-4928-y), 2018-08-01
Supplement: 12864_2018_4928_MOESM2_ESM.pdf [file 12864_2018_4928_MOESM2_ESM.pdf]

# Supplementary materials

---

**Table S1. Fisher's Exact Test Result on Training Data**

| Position | Positive |      | Negative |       | P-value    | log(P-value) |
|----------|----------|------|----------|-------|------------|--------------|
|          | 0        | 1    | 0        | 1     |            |              |
| -25      | 22938    | 3574 | 237968   | 33246 | 1.1392E-08 | 7.943411816  |
| -24      | 23046    | 3466 | 238766   | 32448 | 1.6362E-07 | 6.786161828  |
| -23      | 22873    | 3639 | 236820   | 34394 | 1.4368E-06 | 5.842594305  |
| -22      | 23127    | 3385 | 237734   | 33480 | 4.6296E-02 | 1.334459712  |
| -21      | 23080    | 3432 | 238822   | 32392 | 2.1623E-06 | 5.665074778  |
| -20      | 22956    | 3556 | 237311   | 33903 | 2.2359E-05 | 4.650551911  |
| -19      | 23028    | 3484 | 238524   | 32690 | 3.0275E-07 | 6.51891752   |
| -18      | 23179    | 3333 | 239392   | 31822 | 6.1149E-05 | 4.213613994  |
| -17      | 23008    | 3504 | 236945   | 34269 | 6.9935E-03 | 2.155306589  |
| -16      | 23071    | 3441 | 238012   | 33202 | 5.2626E-04 | 3.278799655  |
| -15      | 23109    | 3403 | 238447   | 32767 | 3.6345E-04 | 3.439555375  |
| -14      | 22890    | 3622 | 236473   | 34741 | 8.5695E-05 | 4.067044889  |
| -13      | 23017    | 3495 | 237358   | 33856 | 1.0991E-03 | 2.958949538  |
| -12      | 23112    | 3400 | 238708   | 32506 | 7.1291E-05 | 4.146964601  |
| -11      | 22977    | 3535 | 237141   | 34073 | 3.3893E-04 | 3.469884854  |
| -10      | 23116    | 3396 | 238467   | 32747 | 5.0566E-04 | 3.296143673  |
| -9       | 23203    | 3309 | 239626   | 31588 | 6.3040E-05 | 4.200380539  |
| -8       | 23035    | 3477 | 237721   | 33493 | 3.4257E-04 | 3.465256475  |
| -7       | 23160    | 3352 | 238377   | 32837 | 1.1075E-02 | 1.95565113   |
| -6       | 23203    | 3309 | 239175   | 32039 | 1.4083E-03 | 2.85131802   |
| -5       | 22963    | 3549 | 236486   | 34728 | 7.1140E-03 | 2.147883425  |
| -4       | 22918    | 3594 | 237319   | 33895 | 9.2043E-07 | 6.036007285  |
| -3       | 23134    | 3378 | 239047   | 32167 | 2.8166E-05 | 4.55028225   |
| -2       | 23520    | 2992 | 245937   | 25277 | 2.3900E-24 | 23.62160012  |

|                       |       |      |        |       |            |             |
|-----------------------|-------|------|--------|-------|------------|-------------|
| <b>-1</b>             | 24019 | 2493 | 249450 | 21764 | 1.5465E-14 | 13.81065704 |
| <b>m<sup>6</sup>A</b> | 24282 | 2230 | 250170 | 21044 | 1.8411E-04 | 3.734925499 |
| <b>1</b>              | 22970 | 3542 | 234720 | 36494 | 6.7129E-01 | 0.173092105 |
| <b>2</b>              | 23288 | 3224 | 234679 | 36535 | 1.4922E-09 | 8.826160222 |
| <b>3</b>              | 22898 | 3614 | 234283 | 36931 | 9.4765E-01 | 0.02335424  |
| <b>4</b>              | 22851 | 3661 | 235042 | 36172 | 3.1919E-02 | 1.495950385 |
| <b>5</b>              | 23055 | 3457 | 236480 | 34734 | 2.8121E-01 | 0.550972658 |
| <b>6</b>              | 23086 | 3426 | 237858 | 33356 | 3.3538E-03 | 2.47446888  |
| <b>7</b>              | 23025 | 3487 | 236516 | 34698 | 9.5986E-02 | 1.017791585 |
| <b>8</b>              | 23134 | 3378 | 238543 | 32671 | 9.8694E-04 | 3.005710269 |
| <b>9</b>              | 23202 | 3310 | 239179 | 32035 | 1.3133E-03 | 2.881649017 |
| <b>10</b>             | 23050 | 3462 | 237082 | 34132 | 2.7208E-02 | 1.56530172  |
| <b>11</b>             | 23058 | 3454 | 237720 | 33494 | 1.4655E-03 | 2.834011725 |
| <b>12</b>             | 23140 | 3372 | 239222 | 31992 | 1.1026E-05 | 4.957564887 |
| <b>13</b>             | 23030 | 3482 | 237314 | 33900 | 3.0605E-03 | 2.514212071 |
| <b>14</b>             | 23183 | 3329 | 238305 | 32909 | 4.5754E-02 | 1.339568637 |
| <b>15</b>             | 23092 | 3420 | 239299 | 31915 | 7.3293E-08 | 7.134938054 |
| <b>16</b>             | 22993 | 3519 | 237004 | 34210 | 2.1694E-03 | 2.663658376 |
| <b>17</b>             | 23130 | 3382 | 237953 | 33261 | 2.0281E-02 | 1.692903976 |
| <b>18</b>             | 23200 | 3312 | 238704 | 32510 | 1.6251E-02 | 1.789117825 |
| <b>19</b>             | 22976 | 3536 | 236972 | 34242 | 9.4642E-04 | 3.023916026 |
| <b>20</b>             | 23227 | 3285 | 237804 | 33410 | 7.3193E-01 | 0.13552882  |
| <b>21</b>             | 23225 | 3287 | 239274 | 31940 | 2.9910E-03 | 2.524182748 |
| <b>22</b>             | 23077 | 3435 | 237502 | 33712 | 1.3765E-02 | 1.861217582 |
| <b>23</b>             | 23205 | 3307 | 238094 | 33120 | 2.1604E-01 | 0.665466371 |
| <b>24</b>             | 23223 | 3289 | 239057 | 32157 | 8.7203E-03 | 2.059467838 |
| <b>25</b>             | 23024 | 3488 | 237090 | 34124 | 7.5174E-03 | 2.123929588 |

(This table shows the Fisher's exact test results on training data. There are 26512 positive and 271214 negative samples in training dataset, and we count the SNP variant states (0 or 1) of each position in positive and negative samples respectively. Then Fisher's exact test is used to evaluate the distribution

difference of SNP states between positive and negative sample, then a P-value is calculated to demonstrate the difference level. A lower P-value means a higher SNP state distribution difference at the position.)

**Table S2. Position SNP Specificity Ranking with MRMR and Fisher's Test**

| <b>position</b>  | <b>Fisher's exact Test</b> | <b>MRMR</b> | <b>Average</b> | <b>Rank</b> |
|------------------|----------------------------|-------------|----------------|-------------|
| -2               | 1                          | 1           | 1              | 1           |
| -1               | 2                          | 5           | 3.5            | 2           |
| -24              | 6                          | 7           | 6.5            | 3           |
| -21              | 10                         | 4           | 7              | 4           |
| -19              | 7                          | 12          | 9.5            | 5           |
| 2                | 3                          | 23          | 13             | 6           |
| -25              | 4                          | 24          | 14             | 7           |
| -11              | 19                         | 9           | 14             | 8           |
| -4               | 8                          | 21          | 14.5           | 9           |
| -15              | 21                         | 11          | 16             | 10          |
| -9               | 15                         | 17          | 16             | 11          |
| -23              | 9                          | 25          | 17             | 12          |
| 16               | 30                         | 8           | 19             | 13          |
| 25               | 36                         | 2           | 19             | 14          |
| -13              | 26                         | 15          | 20.5           | 15          |
| m <sup>6</sup> A | 18                         | 27          | 22.5           | 16          |
| 11               | 29                         | 16          | 22.5           | 17          |
| 18               | 40                         | 6           | 23             | 18          |
| -18              | 14                         | 33          | 23.5           | 19          |
| 6                | 33                         | 14          | 23.5           | 20          |
| 15               | 5                          | 42          | 23.5           | 21          |
| -20              | 12                         | 36          | 24             | 22          |
| -6               | 28                         | 20          | 24             | 23          |
| 9                | 27                         | 22          | 24.5           | 24          |
| -3               | 13                         | 37          | 25             | 25          |
| 13               | 32                         | 18          | 25             | 26          |
| -12              | 16                         | 35          | 25.5           | 27          |
| -8               | 20                         | 31          | 25.5           | 28          |
| 1                | 49                         | 3           | 26             | 29          |
| 22               | 39                         | 13          | 26             | 30          |
| -17              | 34                         | 19          | 26.5           | 31          |
| 19               | 24                         | 32          | 28             | 32          |
| -14              | 17                         | 40          | 28.5           | 33          |
| 12               | 11                         | 48          | 29.5           | 34          |
| 20               | 50                         | 10          | 30             | 35          |
| -16              | 23                         | 41          | 32             | 36          |
| -10              | 22                         | 43          | 32.5           | 37          |
| 24               | 37                         | 28          | 32.5           | 38          |
| 21               | 31                         | 38          | 34.5           | 39          |
| 14               | 44                         | 30          | 37             | 40          |
| 7                | 46                         | 29          | 37.5           | 41          |

|            |    |    |      |    |
|------------|----|----|------|----|
| <b>8</b>   | 25 | 51 | 38   | 42 |
| <b>3</b>   | 51 | 26 | 38.5 | 43 |
| <b>10</b>  | 42 | -2 | 20   | 44 |
| <b>5</b>   | 48 | 34 | 41   | 45 |
| <b>-5</b>  | 35 | 49 | 42   | 46 |
| <b>-7</b>  | 38 | 47 | 42.5 | 47 |
| <b>17</b>  | 41 | 45 | 43   | 48 |
| <b>-22</b> | 45 | 44 | 44.5 | 49 |
| <b>4</b>   | 43 | 50 | 46.5 | 50 |
| <b>23</b>  | 47 | 46 | 46.5 | 51 |

**Table S3. Features Space used in HMpre**

| <b>Feature No.</b> | <b>Feature name</b>                     |
|--------------------|-----------------------------------------|
| 1-204              | 4-bit Binary Encoding                   |
| 205-408            | Chemical Property with Density function |
| 409-488            | K-mer (2-mer, 3- mer)                   |
| 489-500            | SNP                                     |
| 501-502            | Site Location                           |
| 503-509            | Information Theory Feature              |

**Table S4. 10-fold cross validation results of conventional feature combinations with new features**

| <b>Feature Space</b>   | <b>precision</b> | <b>recall</b> | <b>F1</b> | <b>ACC</b> | <b>MCC</b> |
|------------------------|------------------|---------------|-----------|------------|------------|
| 4-bit +3 new           | 0.2577           | 0.5217        | 0.345     | 0.8236     | 0.2777     |
| OPF +3 new             | 0.2601           | 0.5083        | 0.3441    | 0.8275     | 0.2757     |
| K-mer + 3 new          | 0.2098           | 0.3996        | 0.2751    | 0.8124     | 0.1916     |
| 4-bit +OPF +3 new      | 0.2598           | 0.2586        | 0.3445    | 0.8268     | 0.2763     |
| 4-bit +K-mer +3 new    | 0.2651           | 0.5311        | 0.3536    | 0.8271     | 0.288      |
| OPF +K-mer +3 new      | 0.2664           | 0.5187        | 0.352     | 0.8299     | 0.2852     |
| Proposed feature space | 0.2669           | 0.5248        | 0.3538    | 0.8293     | 0.2877     |

(This table shows 10-fold cross validation results of different conventional feature combinations with new features. As is shown in the table, a single conventional feature with 3 new features has relatively lower performance than combinational conventional features. However, the proposed feature space achieves the best overall performance with highest precision, recall, F1 and ACC, so the three conventional features are all important in the prediction.)

## Algorithm S1. SNP Specificity Identification Algorithm

---

### Algorithm: SNP Specificity Identification Algorithm

---

**Input:** 51-bit SNP variant sequences of  $n$  training samples and  $t$  test samples, each sequence is  $(v_1, v_2, \dots, v_{51})$  where  $v_k$  denote the SNP state (0 or 1, variant or not) of  $k$ -th position in samples; training sample label set  $C$ .

- 1: Combine the SNP sequences of training samples into  $n \times 51$  Matrix  $S_0$ ;
  - 2: for  $i = 1$  to 51 do
  - 3:   Calculate probabilistic density function  $p(x_i)$  for column  $i$  in  $S_0$ ;
  - 4:   Calculate  $p(y)$  for  $C$  and joint probability  $p(x_i, y)$ ;
  - 5:   Define mutual information:  $M_i(x_i; y) = \sum_{x_i=0}^1 \sum_{y=0}^1 p(x_i, y) \log \frac{p(x_i, y)}{p(x_i)p(y)}$
  - 6: end for
  - 7: Give the feature number  $m$  of target subsets  $S$ ;
  - 8: for  $j = 1$  to  $m$  do
  - 9:   for  $s_i$  in  $S_0$  do
  - 10:     Put  $s_i$  into  $S$
  - 11:     Dependency between  $S$  and  $C$ :  $D = \frac{1}{|S|} \sum_{x_i \in S} M_i(x_i; y)$
  - 12:     Redundancy among  $S$ :  $R = \frac{1}{|S|^2} \sum_{x_i, x_j \in S} M_i(x_i; x_j)$
  - 13:     Computing  $\phi = D - R$
  - 14:   end for
  - 15:   take the  $s_m$  which has maximum  $\phi$  as the  $j$ -th column of  $S$
  - 16:   mrmr rank( $s_m$ )= $j$
  - 17:   importance( $s_m$ )= $\phi$
  - 18:   Remove  $s_m$  from  $S_0$
  - 19: end for
  - 20: for  $k = 1$  to 51 do
  - 21:   count number of variant at position  $k$  in datasets:
  - 22:     training samples have  $p$  variants and  $q$  non-variants
  - 23:     testing samples have  $p'$  variants and  $q'$  non-variants
  - 24:   p-value = fisher test ( $p, q, p', q'$ )
  - 25: end for
  - 26: fisher test rank = sort(p-value)
  - 27: specificity rank of position  $v$  = average (mrmr rank( $v$ ), fisher test rank( $v$ ))
  - 28: take top 12 SNP-specific positions as *SNP feature*
- Output:** *SNP feature*
-

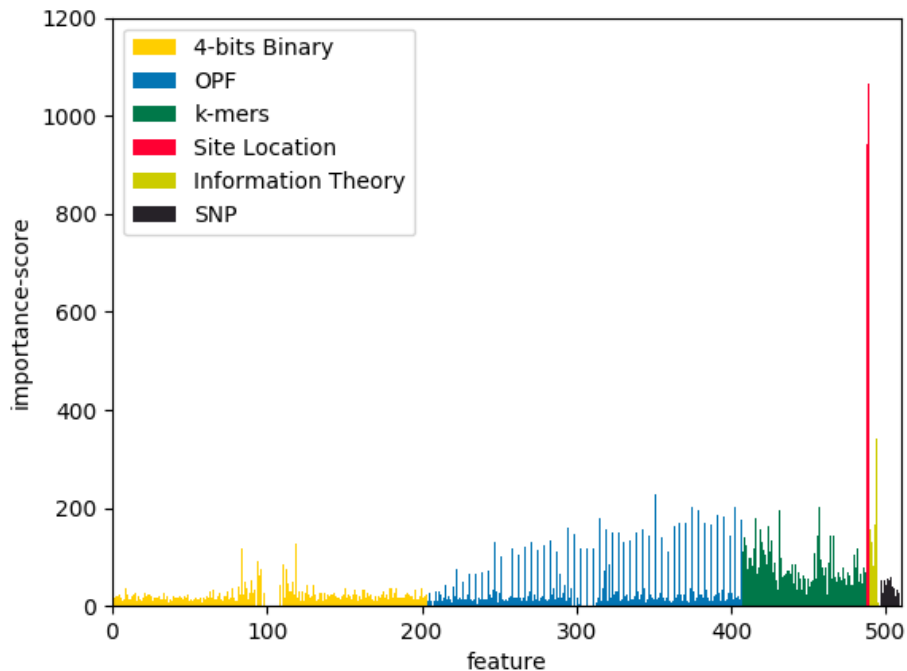

**Fig. S1. Distribution of feature importance scores in XGBoost Classifier learning stage.**

here are 508 features in total and several colours represent features constructed by different coding algorithms. The importance scores of most features are less than 50 in 4-bit Binary and OPF features. Even some features have an average score much less than average, and these features correspond to the m6A and adjacent two sites. The three centre positions of samples are always 'AAC' or 'GAC', so their importance scores are indeed low. And the highest three features are frequency of adenine in transcript, relative site location and relative entropy features. Meanwhile, density features in OPF has are latively high importance, which indicates the nucelotide density of each site make sense in prediction. The importance scores of K-mer and SNP features are almost more than 4-bit Binary and Chemical Property features, which have low significance in the model tree construction.
